# Supplementary material
Source: MDPI journal article supplement (https://www.mdpi.com/1999-4907/6/3/839)
Supplement: s1 [file s1]

**Supplementary Information**

**Table S1.** Number of sequencing reads before and after filtering.

| **Sample Name** | **Before Filter** | **After Filter** | **Reads Filter %** |
| --- | --- | --- | --- |
| Male parent_1 | 46189698 | 43718240 | 95 |
| Male parent_2 | 39601776 | 37805466 | 95 |
| Male parent_3 | 31817816 | 29644804 | 93 |
| Average | 39203096 | 37056170 | 94 |
| Female parent_1 | 36915190 | 34747702 | 94 |
| Female parent_2 | 44228658 | 42295592 | 96 |
| Female parent_3 | 41057742 | 39046676 | 95 |
| Average | 40733863 | 38696656 | 95 |
| PMR_H_1 | 32529584 | 30727624 | 94 |
| PMR_H_2 | 32401910 | 30745554 | 95 |
| PMR_H_3 | 29613944 | 27865492 | 94 |
| Average | 31515146 | 29779556 | 94 |

We used Tophat (v2.0.8) for mapping with parameter as following: --read-mismatches 3 --max-insertion-length 6 --max-deletion-length 6 --read-gap-length 7 --read-edit-dist 12 --b2-sensitive --solexa1.3-quals -p 22 --min-coverage-intron 31 --min-segment-intron 31. Expression: We used the strategy the same with cufflink. If a reads mapped to 2 regions, we added 0.5 to each gene counts as well.

**Table S2.** 320 genes were up-regulated in the high-growth allotriploid progeny (PMR-H) relative to both diploid parents.

| **Poplar Genes** | **Log2 (PMR-H *vs.* Female Parent)** | ***p*** | **Log2 (PMR-H *vs.* Male Parent)** | ***p*** |
| --- | --- | --- | --- | --- |
| Potri.005G162200 | 1.17 | 0.0246961 | 1.60 | 0.003593827 |
| Potri.017G114500 | 1.33 | 0.0281113 | 1.54 | 0.011662277 |
| Potri.014G168700 | 0.61 | 3.12E-06 | 1.26 | 1.39E-18 |
| Potri.014G197100 | 0.59 | 5.33E-05 | 0.76 | 8.12E-08 |
| Potri.001G156900 | 2.06 | 0.0063944 | 3.51 | 2.66E-04 |
| Potri.010G004400 | 1.22 | 7.56E-04 | 1.03 | 0.002096813 |
| Potri.T079800 | 1.10 | 1.81E-04 | 0.61 | 0.01456902 |
| Potri.013G102500 | 0.80 | 0.0049983 | 0.88 | 0.001504145 |
| Potri.003G128200 | 0.69 | 0.0062835 | 0.90 | 3.40E-04 |
| Potri.015G132200 | 0.75 | 0.0454902 | 0.79 | 0.027365087 |
| Potri.006G272400 | 0.72 | 1.14E-07 | 0.65 | 2.02E-07 |
| Potri.002G227300 | 1.13 | 1.43E-04 | 1.18 | 4.46E-05 |
| Potri.002G252900 | 0.68 | 0.0046093 | 1.06 | 1.89E-05 |
| Potri.014G187000 | 0.84 | 0.0014239 | 1.01 | 1.06E-04 |
| Potri.003G071000 | 1.28 | 0.0028549 | 1.04 | 0.008202566 |
| Potri.015G129700 | 0.61 | 2.46E-05 | 0.75 | 8.04E-08 |
| Potri.016G041200 | 0.66 | 0.0015603 | 1.38 | 2.50E-09 |
| Potri.002G237000 | 0.99 | 5.21E-04 | 1.43 | 1.83E-06 |
| Potri.002G222300 | 0.71 | 0.0351161 | 0.88 | 0.007725952 |
| Potri.013G031800 | 0.66 | 1.26E-04 | 1.39 | 3.81E-13 |
| Potri.005G222700 | 0.85 | 0.0336876 | 1.07 | 0.007780135 |
| Potri.009G132100 | 0.70 | 2.45E-04 | 0.72 | 5.97E-05 |

**Table S2.** *Cont.*

| **Poplar Genes** | **Log2 (PMR-H *vs.* Female Parent)** | ***p*** | **Log2 (PMR-H *vs.* Male Parent)** | ***p*** |
| --- | --- | --- | --- | --- |
| Potri.001G173500 | 0.98 | 0.0421688 | 1.24 | 0.010685988 |
| Potri.016G125400 | 1.54 | 2.48E-05 | 1.29 | 1.30E-04 |
| Potri.008G075700 | 0.65 | 0.007492 | 0.86 | 3.67E-04 |
| Potri.002G158200 | 0.65 | 0.0167552 | 0.68 | 0.007704038 |
| Potri.013G136300 | 1.16 | 3.51E-15 | 2.04 | 1.93E-33 |
| Potri.007G088400 | 1.00 | 0.0053165 | 0.76 | 0.018440554 |
| Potri.009G045300 | 0.60 | 0.0216349 | 0.88 | 7.80E-04 |
| Potri.018G079800 | 0.75 | 0.006232 | 0.88 | 0.001040424 |
| Potri.010G055400 | 1.11 | 6.97E-30 | 1.09 | 3.60E-31 |
| Potri.008G043400 | 0.88 | 0.0187009 | 1.53 | 1.86E-04 |
| Potri.001G024500 | 0.78 | 0.0422831 | 0.86 | 0.019344091 |
| Potri.002G255800 | 0.83 | 1.82E-04 | 1.44 | 2.06E-09 |
| Potri.004G155300 | 2.44 | 4.41E-72 | 1.47 | 5.71E-40 |
| Potri.015G147500 | 0.68 | 1.18E-09 | 1.13 | 1.05E-21 |
| Potri.001G123600 | 0.62 | 0.0452121 | 0.98 | 0.002137432 |
| Potri.015G135800 | 0.87 | 3.84E-07 | 0.65 | 2.45E-05 |
| Potri.016G062600 | 1.11 | 0.0273992 | 1.93 | 7.19E-04 |
| Potri.017G122800 | 1.08 | 0.0235142 | 1.33 | 0.006091209 |
| Potri.008G047900 | 1.22 | 0.0048256 | 1.18 | 0.004432395 |
| Potri.012G022400 | 1.74 | 5.41E-96 | 1.06 | 2.60E-50 |
| Potri.012G042200 | 1.63 | 0.002388 | 1.49 | 0.003447976 |
| Potri.013G032300 | 0.75 | 2.14E-05 | 1.33 | 3.39E-12 |
| Potri.003G098800 | 0.83 | 7.40E-04 | 1.03 | 2.91E-05 |
| Potri.002G230200 | 0.64 | 0.0101952 | 1.14 | 1.61E-05 |
| Potri.014G059300 | 0.84 | 0.0378787 | 0.87 | 0.024592726 |
| Potri.002G026600 | 0.82 | 0.0027509 | 1.09 | 7.60E-05 |
| Potri.001G369600 | 0.89 | 5.08E-04 | 1.32 | 9.28E-07 |
| Potri.T035000 | 0.85 | 8.29E-10 | 1.23 | 7.88E-18 |
| Potri.011G055900 | 0.81 | 0.0026185 | 1.12 | 4.55E-05 |
| Potri.019G129900 | 1.01 | 0.014079 | 1.26 | 0.002504599 |
| Potri.007G084200 | 0.96 | 3.86E-04 | 1.43 | 5.47E-07 |
| Potri.012G133600 | 1.11 | 3.13E-04 | 0.64 | 0.014165575 |
| Potri.T074500 | 0.98 | 8.08E-04 | 1.59 | 5.65E-07 |
| Potri.005G040700 | 0.64 | 6.79E-16 | 0.83 | 2.62E-26 |
| Potri.016G025400 | 1.24 | 0.0265095 | 2.67 | 1.76E-04 |
| Potri.007G129700 | 0.64 | 7.46E-06 | 0.59 | 7.63E-06 |
| Potri.005G207600 | 1.69 | 0.0011554 | 0.88 | 0.03837555 |
| Potri.010G088100 | 0.92 | 3.28E-10 | 1.65 | 5.41E-24 |
| Potri.018G139800 | 0.71 | 0.0191082 | 1.14 | 3.50E-04 |
| Potri.005G096900 | 0.84 | 0.0461203 | 1.36 | 0.00248555 |
| Potri.013G058400 | 0.70 | 0.0040136 | 0.95 | 9.71E-05 |
| Potri.T177700 | 1.33 | 1.42E-08 | 1.25 | 1.89E-08 |
| Potri.016G017100 | 0.60 | 6.62E-05 | 0.64 | 8.02E-06 |
| Potri.001G051500 | 0.85 | 5.14E-15 | 1.18 | 6.84E-26 |
| Potri.008G157300 | 0.71 | 0.0333719 | 1.36 | 1.81E-04 |

**Table S2.** *Cont.*

| **Poplar Genes** | **Log2 (PMR-H *vs.* Female Parent)** | ***p*** | **Log2 (PMR-H *vs.* Male Parent)** | ***p*** |
| --- | --- | --- | --- | --- |
| Potri.007G071100 | 1.17 | 1.43E-08 | 1.34 | 7.30E-11 |
| Potri.010G040900 | 0.59 | 0.0035459 | 0.68 | 4.22E-04 |
| Potri.003G111300 | 1.72 | 6.51E-14 | 2.33 | 1.52E-20 |
| Potri.008G114400 | 0.95 | 5.49E-04 | 0.94 | 3.24E-04 |
| Potri.010G183900 | 2.06 | 7.79E-06 | 0.82 | 0.018602723 |
| Potri.016G024300 | 0.73 | 0.024652 | 0.98 | 0.002778482 |
| Potri.005G061000 | 1.36 | 0.0271198 | 1.23 | 0.033409062 |
| Potri.010G163200 | 0.72 | 0.0037784 | 0.89 | 3.04E-04 |
| Potri.015G092900 | 0.72 | 1.66E-05 | 1.28 | 9.48E-13 |
| Potri.015G050800 | 0.83 | 0.0431067 | 1.07 | 0.009786778 |
| Potri.013G126800 | 0.95 | 0.0404239 | 0.88 | 0.043046553 |
| Potri.002G172800 | 0.61 | 0.0323549 | 0.64 | 0.017042379 |
| Potri.007G021800 | 0.81 | 0.0481398 | 1.00 | 0.014523567 |
| Potri.002G201200 | 0.61 | 0.0449127 | 0.74 | 0.012176856 |
| Potri.004G185800 | 0.59 | 9.48E-19 | 0.66 | 8.42E-26 |
| Potri.008G121200 | 1.06 | 0.0429911 | 1.84 | 0.001862195 |
| Potri.008G033000 | 0.81 | 2.85E-05 | 0.87 | 3.13E-06 |
| Potri.003G218500 | 0.73 | 0.0130045 | 0.65 | 0.016104643 |
| Potri.016G081700 | 0.68 | 8.02E-05 | 0.69 | 1.87E-05 |
| Potri.010G176000 | 0.64 | 0.0080161 | 1.39 | 3.08E-07 |
| Potri.010G041000 | 1.05 | 0.0016536 | 0.82 | 0.006540594 |
| Potri.015G120700 | 0.61 | 0.0012197 | 1.20 | 5.61E-09 |
| Potri.014G050500 | 0.75 | 2.80E-09 | 0.85 | 3.55E-12 |
| Potri.017G060200 | 0.62 | 0.0276289 | 0.81 | 0.003904382 |
| Potri.017G063900 | 0.65 | 0.0028488 | 0.85 | 7.04E-05 |
| Potri.010G097400 | 0.94 | 0.0149943 | 0.91 | 0.012807029 |
| Potri.003G200700 | 0.76 | 0.0071864 | 1.86 | 4.53E-08 |
| Potri.001G281300 | 0.87 | 0.0020904 | 1.10 | 1.06E-04 |
| Potri.001G006700 | 1.15 | 1.54E-07 | 0.70 | 2.04E-04 |
| Potri.001G048800 | 1.01 | 0.0065457 | 1.38 | 3.38E-04 |
| Potri.010G108500 | 0.78 | 0.0389918 | 0.71 | 0.042367032 |
| Potri.017G099200 | 0.68 | 0.0318698 | 0.89 | 0.004358429 |
| Potri.018G079600 | 1.22 | 0.0164869 | 1.50 | 0.003942114 |
| Potri.013G013500 | 0.66 | 0.04577 | 2.13 | 5.14E-07 |
| Potri.010G133900 | 0.72 | 0.0077219 | 0.96 | 3.72E-04 |
| Potri.015G023200 | 0.92 | 0.0428006 | 0.83 | 0.049201199 |
| Potri.019G034900 | 0.84 | 0.0255851 | 0.77 | 0.028208039 |
| Potri.001G350600 | 0.68 | 1.46E-06 | 0.67 | 3.88E-07 |
| Potri.005G084500 | 0.89 | 0.0264637 | 2.46 | 2.78E-06 |
| Potri.007G012500 | 0.89 | 2.83E-16 | 0.64 | 2.72E-11 |
| Potri.006G151600 | 1.46 | 0.0180167 | 2.79 | 2.80E-04 |
| Potri.002G259000 | 0.63 | 0.0168762 | 0.70 | 0.005311779 |
| Potri.018G026200 | 0.60 | 0.0028828 | 1.02 | 1.12E-06 |
| Potri.018G146100 | 1.54 | 6.64E-07 | 1.24 | 1.16E-05 |

**Table S2.** *Cont.*

| **Poplar Genes** | **Log2 (PMR-H *vs.* Female Parent)** | ***p*** | **Log2 (PMR-H *vs.* Male Parent)** | ***p*** |
| --- | --- | --- | --- | --- |
| Potri.001G070500 | 0.73 | 0.001411 | 1.32 | 1.04E-07 |
| Potri.001G113100 | 0.60 | 2.19E-26 | 1.39 | 3.64E-104 |
| Potri.T143400 | 0.63 | 0.0378016 | 1.48 | 1.95E-05 |
| Potri.014G165700 | 1.12 | 6.41E-04 | 0.64 | 0.02118559 |
| Potri.013G143700 | 1.28 | 1.57E-24 | 1.65 | 1.29E-36 |
| Potri.001G164100 | 0.69 | 0.0164026 | 1.36 | 2.01E-05 |
| Potri.010G003600 | 0.88 | 0.0467762 | 0.90 | 0.032979499 |
| Potri.014G117800 | 0.78 | 0.008596 | 0.76 | 0.006200173 |
| Potri.003G159700 | 0.89 | 0.0026213 | 1.11 | 1.93E-04 |
| Potri.014G020900 | 0.60 | 0.0341023 | 0.63 | 0.018708139 |
| Potri.007G119800 | 1.01 | 0.0312002 | 1.97 | 2.97E-04 |
| Potri.018G101400 | 1.05 | 0.0023432 | 0.93 | 0.003653967 |
| Potri.014G007200 | 0.61 | 0.0202737 | 1.28 | 1.09E-05 |
| Potri.010G109600 | 0.68 | 3.19E-11 | 0.72 | 9.52E-14 |
| Potri.003G176800 | 1.21 | 1.61E-26 | 0.86 | 1.97E-17 |
| Potri.008G021100 | 0.75 | 0.0030849 | 1.12 | 1.88E-05 |
| Potri.019G001300 | 0.96 | 2.49E-05 | 0.97 | 8.10E-06 |
| Potri.003G146400 | 0.73 | 0.0071942 | 1.55 | 4.51E-07 |
| Potri.012G129200 | 0.88 | 0.0299537 | 1.09 | 0.00693207 |
| Potri.014G152600 | 1.46 | 1.77E-05 | 2.30 | 2.78E-09 |
| Potri.002G102900 | 0.71 | 0.0014695 | 0.62 | 0.002347975 |
| Potri.001G457000 | 1.14 | 1.10E-08 | 1.01 | 6.69E-08 |
| Potri.015G075900 | 0.81 | 0.015669 | 2.51 | 2.48E-08 |
| Potri.015G057300 | 0.82 | 2.25E-04 | 1.17 | 3.13E-07 |
| Potri.013G103800 | 0.63 | 0.0136995 | 0.80 | 0.00129091 |
| Potri.014G034600 | 0.78 | 0.0174207 | 0.88 | 0.005995749 |
| Potri.003G198500 | 0.84 | 6.52E-04 | 1.00 | 4.27E-05 |
| Potri.001G104900 | 0.66 | 0.0255739 | 0.89 | 0.002746866 |
| Potri.008G114700 | 0.98 | 0.047423 | 1.71 | 0.001917216 |
| Potri.015G056500 | 0.94 | 0.0400866 | 3.60 | 7.70E-07 |
| Potri.001G094800 | 0.87 | 0.0067114 | 1.14 | 4.80E-04 |
| Potri.018G093400 | 1.03 | 0.0018797 | 0.92 | 0.002860778 |
| Potri.007G020000 | 1.28 | 6.25E-06 | 1.94 | 5.53E-10 |
| Potri.018G112800 | 0.69 | 8.16E-04 | 1.10 | 2.78E-07 |
| Potri.007G081200 | 1.74 | 0.007069 | 1.82 | 0.004422029 |
| Potri.010G214000 | 0.81 | 3.07E-17 | 0.63 | 2.27E-13 |
| Potri.T166200 | 3.42 | 1.73E-09 | 1.12 | 0.001927129 |
| Potri.007G095700 | 0.79 | 2.92E-05 | 0.87 | 2.14E-06 |
| Potri.003G172600 | 0.68 | 0.006407 | 1.39 | 4.85E-07 |
| Potri.009G116400 | 1.93 | 1.41E-79 | 2.41 | 8.75E-108 |
| Potri.010G006800 | 0.66 | 0.0121235 | 1.81 | 1.09E-08 |
| Potri.015G133400 | 0.71 | 0.0106944 | 1.34 | 9.83E-06 |
| Potri.010G195800 | 0.60 | 7.79E-04 | 0.67 | 7.42E-05 |

**Table S2.** *Cont.*

| **Poplar Genes** | **Log2 (PMR-H *vs.* Female Parent)** | ***p*** | **Log2 (PMR-H *vs.* Male Parent)** | ***p*** |
| --- | --- | --- | --- | --- |
| Potri.017G093300 | 0.76 | 0.0117411 | 0.93 | 0.001855831 |
| Potri.014G187500 | 0.74 | 0.0133198 | 1.36 | 3.06E-05 |
| Potri.013G064200 | 1.11 | 0.0162547 | 1.88 | 2.81E-04 |
| Potri.002G100600 | 0.86 | 0.0020583 | 1.03 | 1.74E-04 |
| Potri.011G047300 | 1.41 | 1.58E-06 | 1.27 | 4.15E-06 |
| Potri.014G187300 | 0.92 | 1.09E-05 | 0.76 | 7.59E-05 |
| Potri.002G259600 | 0.74 | 0.010126 | 0.91 | 0.001348613 |
| Potri.006G100000 | 2.86 | 6.17E-06 | 1.04 | 0.01761376 |
| Potri.001G047300 | 1.43 | 0.017751 | 2.24 | 0.001021007 |
| Potri.005G093100 | 0.77 | 3.00E-08 | 1.08 | 2.22E-14 |
| Potri.015G017500 | 0.69 | 1.80E-06 | 1.66 | 1.26E-22 |
| Potri.T177600 | 0.86 | 4.93E-04 | 1.01 | 3.26E-05 |
| Potri.009G076600 | 0.80 | 0.0075866 | 0.98 | 9.15E-04 |
| Potri.005G123700 | 0.98 | 1.00E-15 | 0.90 | 5.48E-15 |
| Potri.015G076000 | 0.87 | 6.16E-04 | 2.72 | 8.74E-15 |
| Potri.009G089500 | 0.68 | 0.0269626 | 1.06 | 8.66E-04 |
| Potri.006G044100 | 0.87 | 1.47E-04 | 1.95 | 1.10E-12 |
| Potri.006G132600 | 0.70 | 0.0170432 | 0.72 | 0.009200719 |
| Potri.001G012000 | 0.77 | 0.0412557 | 3.29 | 2.37E-08 |
| Potri.014G012800 | 0.85 | 7.14E-07 | 1.28 | 1.16E-12 |
| Potri.006G209000 | 1.42 | 0.049484 | 1.57 | 0.029624734 |
| Potri.001G118900 | 0.59 | 0.0163502 | 0.75 | 0.001874817 |
| Potri.008G002500 | 0.87 | 1.07E-10 | 0.71 | 6.98E-09 |
| Potri.006G272300 | 1.20 | 0.0201625 | 2.15 | 3.44E-04 |
| Potri.009G118400 | 0.82 | 0.0018244 | 1.12 | 2.57E-05 |
| Potri.004G180900 | 0.92 | 0.0317023 | 0.90 | 0.026528125 |
| Potri.016G093500 | 0.97 | 1.97E-04 | 0.62 | 0.005993026 |
| Potri.017G070000 | 0.65 | 0.0315422 | 1.03 | 8.91E-04 |
| Potri.T147100 | 0.96 | 0.0141605 | 0.92 | 0.013220004 |
| Potri.004G019900 | 1.32 | 3.49E-04 | 0.73 | 0.018177436 |
| Potri.T066200 | 1.24 | 0.0418135 | 1.49 | 0.016123584 |
| Potri.016G036100 | 0.79 | 0.0260286 | 1.23 | 0.001012367 |
| Potri.009G058500 | 0.61 | 0.0252011 | 0.86 | 0.001579353 |
| Potri.007G068800 | 0.89 | 0.0349924 | 0.98 | 0.016935915 |
| Potri.002G060800 | 0.82 | 3.47E-08 | 0.65 | 1.06E-06 |
| Potri.002G242100 | 0.59 | 0.0175926 | 0.70 | 0.003422098 |
| Potri.003G220100 | 0.64 | 0.0170394 | 1.17 | 4.79E-05 |
| Potri.017G011500 | 1.55 | 0.0011295 | 1.01 | 0.0138022 |
| Potri.012G101900 | 1.45 | 0.0087758 | 1.18 | 0.020075644 |
| Potri.015G110700 | 1.73 | 0.0129736 | 3.22 | 3.09E-04 |
| Potri.018G138200 | 0.59 | 0.0406004 | 0.81 | 0.004874084 |
| Potri.004G172600 | 1.26 | 2.60E-41 | 1.11 | 4.73E-37 |
| Potri.001G238700 | 0.83 | 8.10E-07 | 1.49 | 5.23E-16 |

**Table S2.** *Cont.*

| **Poplar Genes** | **Log2 (PMR-H *vs.* Female Parent)** | ***p*** | **Log2 (PMR-H *vs.* Male Parent)** | ***p*** |
| --- | --- | --- | --- | --- |
| Potri.005G028000 | 0.64 | 2.25E-08 | 1.75 | 1.44E-36 |
| Potri.008G083900 | 0.73 | 0.0047037 | 0.94 | 2.65E-04 |
| Potri.017G017700 | 0.82 | 0.0419558 | 1.08 | 0.008207993 |
| Potri.007G048000 | 0.68 | 0.0468793 | 1.09 | 0.002162501 |
| Potri.015G056100 | 0.85 | 3.17E-05 | 0.69 | 2.04E-04 |
| Potri.010G149900 | 1.24 | 0.0120202 | 1.42 | 0.004169702 |
| Potri.013G136400 | 1.18 | 4.32E-22 | 1.69 | 3.26E-38 |
| Potri.019G031200 | 0.97 | 6.15E-227 | 0.70 | 4.06E-152 |
| Potri.014G010200 | 0.70 | 0.037422 | 0.62 | 0.045415054 |
| Potri.003G075900 | 0.73 | 0.0424577 | 0.82 | 0.018766973 |
| Potri.014G068700 | 1.00 | 1.38E-07 | 1.32 | 1.31E-11 |
| Potri.017G085500 | 0.61 | 0.0153882 | 1.00 | 1.14E-04 |
| Potri.004G227200 | 0.61 | 0.0256894 | 0.70 | 0.007699869 |
| Potri.010G042700 | 1.44 | 1.04E-11 | 1.51 | 3.90E-13 |
| Potri.012G060000 | 0.71 | 0.0171284 | 1.17 | 1.85E-04 |
| Potri.010G125700 | 1.00 | 0.0015127 | 0.83 | 0.003991252 |
| Potri.002G257200 | 0.74 | 0.0015795 | 0.86 | 1.49E-04 |
| Potri.T002100 | 2.02 | 1.84E-04 | 1.49 | 0.001812849 |
| Potri.006G010200 | 0.60 | 1.06E-05 | 3.26 | 1.21E-50 |
| Potri.014G152300 | 1.37 | 1.26E-04 | 2.29 | 3.03E-08 |
| Potri.004G030700 | 0.66 | 1.65E-16 | 1.17 | 8.26E-43 |
| Potri.002G114800 | 0.80 | 3.26E-04 | 1.19 | 2.88E-07 |
| Potri.003G133500 | 0.95 | 0.0070585 | 0.64 | 0.037780728 |
| Potri.009G132000 | 0.73 | 2.44E-31 | 0.60 | 3.08E-26 |
| Potri.006G188700 | 0.75 | 0.0494937 | 0.94 | 0.012592943 |
| Potri.007G026200 | 0.66 | 7.69E-16 | 0.69 | 6.74E-19 |
| Potri.T131600 | 1.48 | 1.61E-08 | 0.62 | 0.002592073 |
| Potri.014G099400 | 0.74 | 0.0471979 | 1.00 | 0.007612865 |
| Potri.019G109700 | 2.48 | 0.0015298 | 3.79 | 9.95E-05 |
| Potri.015G104800 | 0.90 | 4.48E-07 | 0.83 | 7.06E-07 |
| Potri.016G102200 | 0.66 | 0.0438759 | 0.65 | 0.032477079 |
| Potri.009G121500 | 0.78 | 6.78E-04 | 0.98 | 1.63E-05 |
| Potri.003G119100 | 1.30 | 7.52E-18 | 1.61 | 3.11E-25 |
| Potri.019G022200 | 1.00 | 0.0300165 | 4.30 | 1.41E-07 |
| Potri.001G051600 | 0.77 | 8.00E-18 | 1.32 | 3.99E-43 |
| Potri.006G190300 | 0.61 | 0.0102062 | 1.07 | 2.07E-05 |
| Potri.010G158500 | 0.96 | 0.0135959 | 0.90 | 0.014264812 |
| Potri.015G050200 | 1.18 | 5.22E-08 | 1.48 | 2.72E-11 |
| Potri.004G031300 | 0.65 | 4.60E-06 | 0.86 | 8.22E-10 |
| Potri.019G041500 | 0.82 | 0.0416027 | 0.80 | 0.033676889 |
| Potri.006G149400 | 0.63 | 0.0052378 | 0.89 | 7.23E-05 |
| Potri.012G095400 | 0.83 | 4.22E-04 | 0.86 | 1.33E-04 |
| Potri.019G022000 | 0.88 | 0.0219249 | 2.94 | 7.97E-08 |

**Table S2.** *Cont.*

| **Poplar Genes** | **Log2 (PMR-H *vs.* Female Parent)** | ***p*** | **Log2 (PMR-H *vs.* Male Parent)** | ***p*** |
| --- | --- | --- | --- | --- |
| Potri.001G369500 | 0.89 | 0.009051 | 0.87 | 0.007112992 |
| Potri.004G131600 | 0.67 | 0.0017137 | 1.42 | 3.24E-09 |
| Potri.012G002200 | 0.68 | 0.0138222 | 0.66 | 0.010809049 |
| Potri.006G098700 | 0.76 | 0.0495643 | 1.06 | 0.007215265 |
| Potri.004G201900 | 0.59 | 0.0227144 | 0.98 | 2.64E-04 |
| Potri.002G052600 | 1.07 | 5.07E-04 | 0.76 | 0.005804935 |
| Potri.013G123700 | 0.72 | 0.0385707 | 1.24 | 8.25E-04 |
| Potri.009G116600 | 0.91 | 0.0332136 | 0.90 | 0.025559775 |
| Potri.018G123500 | 0.98 | 0.0277302 | 1.34 | 0.003464721 |
| Potri.010G140100 | 0.79 | 0.0343024 | 1.50 | 3.03E-04 |
| Potri.003G208900 | 1.04 | 4.62E-05 | 0.75 | 9.64E-04 |
| Potri.009G096600 | 0.66 | 3.28E-04 | 1.15 | 2.96E-09 |
| Potri.T125900 | 1.65 | 2.54E-24 | 1.24 | 1.19E-17 |
| Potri.007G000900 | 0.67 | 6.03E-06 | 0.64 | 2.86E-06 |
| Potri.006G117700 | 0.91 | 0.0127956 | 1.13 | 0.002170776 |
| Potri.001G074000 | 0.70 | 0.0124083 | 1.17 | 8.02E-05 |
| Potri.005G206900 | 2.23 | 0.0017554 | 1.46 | 0.015568785 |
| Potri.017G010500 | 1.34 | 4.10E-04 | 1.21 | 7.14E-04 |
| Potri.010G021400 | 0.64 | 0.0204608 | 1.14 | 1.13E-04 |
| Potri.005G124700 | 0.81 | 0.0119064 | 0.93 | 0.003208108 |
| Potri.013G073300 | 0.60 | 5.05E-10 | 0.69 | 8.15E-14 |
| Potri.006G118300 | 1.28 | 0.0152005 | 1.51 | 0.004605156 |
| Potri.T162000 | 0.91 | 3.85E-06 | 1.00 | 1.79E-07 |
| Potri.T116700 | 0.78 | 7.21E-08 | 0.73 | 6.26E-08 |
| Potri.007G028400 | 0.92 | 0.0407762 | 1.30 | 0.005311779 |
| Potri.006G108100 | 1.17 | 4.43E-129 | 0.61 | 1.02E-51 |
| Potri.003G163600 | 0.63 | 0.0095704 | 1.03 | 4.21E-05 |
| Potri.002G108400 | 0.64 | 0.0121313 | 1.25 | 6.14E-06 |
| Potri.003G176700 | 0.70 | 2.69E-36 | 0.89 | 1.35E-58 |
| Potri.014G155300 | 1.47 | 2.14E-07 | 2.12 | 1.01E-11 |
| Potri.015G147700 | 0.79 | 0.0090112 | 1.29 | 6.46E-05 |
| Potri.019G100400 | 3.52 | 6.42E-06 | 2.96 | 2.14E-05 |
| Potri.003G176900 | 1.32 | 4.84E-37 | 0.64 | 4.77E-14 |
| Potri.009G093400 | 0.86 | 8.58E-06 | 0.69 | 7.95E-05 |
| Potri.001G300900 | 0.81 | 1.59E-05 | 0.89 | 1.14E-06 |
| Potri.014G152900 | 1.43 | 8.92E-06 | 2.17 | 1.60E-09 |
| Potri.009G096000 | 1.33 | 0.0367593 | 1.82 | 0.007377361 |
| Potri.004G054100 | 0.61 | 0.0363662 | 2.23 | 8.10E-09 |
| Potri.002G175700 | 0.89 | 0.0165149 | 0.69 | 0.038922038 |
| Potri.014G027200 | 0.80 | 0.0299838 | 1.18 | 0.001926934 |
| Potri.002G115300 | 0.98 | 9.34E-05 | 0.74 | 0.001009169 |
| Potri.007G076700 | 0.66 | 0.0081575 | 1.24 | 4.07E-06 |
| Potri.005G077400 | 1.14 | 0.0389541 | 1.49 | 0.009222059 |

**Table S2.** *Cont.*

| **Poplar Genes** | **Log2 (PMR-H *vs.* Female Parent)** | ***p*** | **Log2 (PMR-H *vs.* Male Parent)** | ***p*** |
| --- | --- | --- | --- | --- |
| Potri.010G060900 | 1.46 | 0.0097068 | 1.57 | 0.005023606 |
| Potri.013G032000 | 0.97 | 0.0411927 | 1.20 | 0.012386785 |
| Potri.010G176500 | 0.61 | 0.0382297 | 0.82 | 0.004743452 |
| Potri.002G066100 | 1.18 | 0.001526 | 1.21 | 7.69E-04 |
| Potri.002G033600 | 0.61 | 4.40E-06 | 1.41 | 4.11E-21 |
| Potri.007G126600 | 0.59 | 0.0434587 | 1.25 | 1.12E-04 |
| Potri.011G025000 | 1.25 | 0.0449903 | 1.97 | 0.004562715 |
| Potri.007G019900 | 1.43 | 9.23E-06 | 1.23 | 4.14E-05 |
| Potri.002G043300 | 1.23 | 2.30E-05 | 0.94 | 3.24E-04 |
| Potri.016G023100 | 0.59 | 0.0452689 | 0.65 | 0.019811125 |
| Potri.T153200 | 0.91 | 0.0018498 | 1.68 | 2.98E-07 |
| Potri.001G333700 | 1.07 | 0.0061579 | 0.94 | 0.010001463 |
| Potri.019G046000 | 1.67 | 0.0126037 | 1.28 | 0.033492924 |
| Potri.001G319800 | 0.86 | 8.42E-04 | 1.12 | 1.45E-05 |
| Potri.011G103900 | 0.63 | 0.0476556 | 0.86 | 0.006144604 |
| Potri.015G085500 | 0.99 | 1.01E-06 | 0.89 | 2.67E-06 |
| Potri.001G437400 | 1.67 | 7.38E-21 | 2.12 | 3.38E-29 |
| Potri.001G098000 | 0.89 | 0.0013664 | 0.97 | 3.42E-04 |
| Potri.014G014900 | 0.69 | 0.0372494 | 0.82 | 0.010719069 |
| Potri.002G005600 | 0.83 | 0.0420404 | 0.86 | 0.02761833 |
| Potri.006G212400 | 0.69 | 0.0339946 | 0.71 | 0.021063157 |
| Potri.014G138100 | 0.84 | 5.30E-04 | 1.50 | 1.58E-08 |
| Potri.002G205100 | 1.36 | 4.76E-04 | 0.89 | 0.008746257 |
| Potri.013G143800 | 0.99 | 3.80E-08 | 1.85 | 2.71E-19 |
| Potri.010G228700 | 0.84 | 5.45E-04 | 0.71 | 0.001298332 |
| Potri.004G029900 | 0.83 | 0.0181268 | 0.99 | 0.004179754 |
| Potri.013G025300 | 0.92 | 1.27E-05 | 1.31 | 2.25E-09 |
| Potri.T002500 | 1.87 | 0.0059471 | 1.21 | 0.037592397 |
| Potri.004G090300 | 1.61 | 0.0065054 | 1.99 | 0.001296609 |
| Potri.005G252600 | 0.68 | 2.42E-13 | 0.61 | 5.66E-13 |
| Potri.015G004700 | 1.73 | 3.37E-04 | 1.31 | 0.002412759 |
| Potri.009G135100 | 0.88 | 8.49E-04 | 0.66 | 0.004866114 |
| Potri.015G035900 | 0.96 | 0.0185448 | 2.10 | 2.04E-05 |
| Potri.006G178700 | 1.03 | 0.0122641 | 1.28 | 0.002072708 |
| Potri.T002300 | 1.82 | 0.0194668 | 1.56 | 0.030340253 |
| Potri.015G128100 | 0.85 | 0.0420111 | 1.57 | 6.87E-04 |
| Potri.013G125800 | 0.60 | 0.0489471 | 0.92 | 0.003147628 |

**Table S3.** 275 genes were down-regulated in the high-growth allotriploid progeny
(PMR-H) relative to both diploid parents.

| **Poplar Genes** | **Log2 (PMR-H *vs.* Female Parent)** | ***p*** | **Log2 (PMR-H *vs.*  Male Parent)** | ***p*** |
| --- | --- | --- | --- | --- |
| Potri.004G187200 | −1.78 | 1.26 × 10−9 | −1.43 | 8.85 × 10−6 |
| Potri.001G079800 | −1.52 | 0.002356 | −1.83 | 1.56 × 10−4 |
| Potri.015G089700 | −0.95 | 6.71E-10 | −0.81 | 1.40E-06 |
| Potri.T006200 | −1.32 | 1.48E-04 | −1.11 | 0.003186795 |
| Potri.006G016200 | −1.06 | 0.008835 | −1.15 | 0.005704955 |
| Potri.009G037000 | −0.59 | 3.86E-04 | −0.85 | 2.30E-07 |
| Potri.006G103900 | −0.91 | 1.64E-06 | −0.64 | 0.003150208 |
| Potri.006G073500 | −1.08 | 8.09E-17 | −1.11 | 1.74E-16 |
| Potri.011G032700 | −0.64 | 0.04479 | −1.12 | 2.22E-04 |
| Potri.008G075200 | −0.87 | 4.05E-05 | −0.88 | 8.12E-05 |
| Potri.013G100700 | −1.37 | 4.88E-19 | −0.69 | 2.64E-04 |
| Potri.013G080500 | −1.30 | 6.32E-73 | −1.16 | 6.69E-52 |
| Potri.004G187400 | −1.65 | 1.14E-41 | −1.99 | 4.91E-64 |
| Potri.009G081500 | −0.61 | 8.32E-04 | −1.07 | 9.22E-10 |
| Potri.009G049900 | −1.93 | 1.14E-08 | −1.95 | 1.52E-08 |
| Potri.013G119800 | −1.49 | 1.64E-08 | −0.70 | 0.033654551 |
| Potri.T165400 | −0.70 | 0.009863 | −0.75 | 0.008584806 |
| Potri.010G080100 | −2.87 | 0.013045 | −3.09 | 0.006292625 |
| Potri.016G124700 | −0.67 | 4.92E-04 | −1.81 | 3.83E-30 |
| Potri.T147200 | −0.63 | 1.95E-30 | −0.77 | 7.16E-42 |
| Potri.003G113400 | −0.81 | 1.38E-13 | −0.66 | 6.45E-08 |
| Potri.018G100200 | −1.90 | 2.30E-11 | −1.52 | 1.25E-06 |
| Potri.008G121700 | −0.86 | 0.020916 | −1.57 | 3.09E-06 |
| Potri.010G209900 | −0.59 | 2.45E-15 | −0.82 | 2.68E-27 |
| Potri.001G052300 | −0.82 | 1.48E-07 | −0.76 | 5.67E-06 |
| Potri.015G087800 | −0.80 | 3.60E-07 | −0.62 | 4.74E-04 |
| Potri.019G057500 | −1.26 | 5.03E-04 | −2.20 | 2.37E-12 |
| Potri.014G149400 | −1.47 | 0.001201 | −0.93 | 1.99E-42 |
| Potri.019G100600 | −0.67 | 0.010114 | −1.76 | 7.06E-16 |
| Potri.009G126900 | −1.93 | 0.002677 | −1.44 | 0.046990607 |
| Potri.005G153600 | −1.24 | 0.002029 | −1.84 | 7.93E-07 |
| Potri.008G069400 | −0.84 | 0.001296 | −1.14 | 8.31E-06 |
| Potri.019G093100 | −1.30 | 8.24E-10 | −2.31 | 1.27E-37 |
| Potri.002G190800 | −0.90 | 0.001975 | −2.74 | 7.60E-38 |
| Potri.010G052000 | −0.73 | 1.02E-31 | −0.92 | 7.26E-48 |
| Potri.003G082700 | −0.73 | 1.27E-15 | −0.99 | 1.26E-27 |
| Potri.003G109200 | −3.04 | 0.00825 | −3.27 | 2.72E-302 |
| Potri.005G117800 | −0.79 | 0.049521 | −0.84 | 0.045035377 |
| Potri.012G116500 | −0.61 | 0.041258 | −1.79 | 4.46E-13 |
| Potri.002G241700 | −0.89 | 2.15E-21 | −1.01 | 7.22E-26 |
| Potri.T093600 | −0.63 | 0.007531 | −0.98 | 2.19E-05 |

**Table S3.** *Cont.*

| **Poplar Genes** | **Log2 (PMR-H *vs.* Female Parent)** | ***p*** | **Log2 (PMR-H *vs.* Male Parent)** | ***p*** |
| --- | --- | --- | --- | --- |
| Potri.001G221200 | −2.22 | 3.38E-09 | −1.59 | 2.47E-04 |
| Potri.013G080400 | −1.44 | 4.60E-34 | −0.80 | 1.75E-08 |
| Potri.019G050200 | −0.71 | 7.92E-71 | −1.08 | 8.96E-175 |
| Potri.018G089400 | −1.04 | 8.47E-13 | −2.20 | 1.69E-75 |
| Potri.018G099800 | −0.63 | 3.11E-05 | −0.66 | 6.01E-05 |
| Potri.013G060800 | −0.63 | 0.033993 | −1.87 | 4.30E-15 |
| Potri.005G168700 | −0.62 | 0.0097 | −0.92 | 1.14E-04 |
| Potri.011G075000 | −1.01 | 2.34E-34 | −0.68 | 6.51E-13 |
| Potri.007G105900 | −0.65 | 9.36E-27 | −1.12 | 2.80E-83 |
| Potri.002G166300 | −1.05 | 3.99E-07 | −0.66 | 0.006677836 |
| Potri.014G186000 | −1.54 | 2.06E-07 | −1.46 | 2.84E-06 |
| Potri.010G151700 | −1.17 | 1.43E-30 | −1.54 | 5.40E-55 |
| Potri.014G126400 | −2.96 | 0.011394 | −3.21 | 0.004738254 |
| Potri.002G221400 | −0.67 | 0.009 | −0.65 | 2.18E-86 |
| Potri.009G039200 | −1.67 | 1.30E-51 | −2.71 | 1.23E-183 |
| Potri.015G057000 | −1.18 | 3.74E-28 | −0.61 | 3.52E-06 |
| Potri.006G219800 | −0.67 | 0.001228 | −0.87 | 3.70E-05 |
| Potri.014G143400 | −0.61 | 0.022429 | −0.62 | 0.033167436 |
| Potri.001G348900 | −1.20 | 1.14E-84 | −0.94 | 1.24E-43 |
| Potri.001G239700 | −0.60 | 1.92E-08 | −1.32 | 5.90E-43 |
| Potri.004G073600 | −1.75 | 5.10E-88 | −1.45 | 3.65E-52 |
| Potri.016G139100 | −0.59 | 0.004513 | −0.62 | 0.004819884 |
| Potri.012G070900 | −0.73 | 3.27E-04 | −1.24 | 1.13E-10 |
| Potri.001G412500 | −4.13 | 7.66E-09 | −3.46 | 2.07E-05 |
| Potri.013G027100 | −1.03 | 0.040262 | −2.04 | 1.76E-06 |
| Potri.004G181100 | −0.61 | 0.041162 | −1.01 | 4.26E-04 |
| Potri.011G112700 | −0.72 | 1.64E-14 | −0.66 | 7.94E-11 |
| Potri.018G075200 | −1.83 | 1.12E-67 | −1.80 | 9.45E-62 |
| Potri.004G231000 | −0.83 | 0.021127 | −1.08 | 0.002355546 |
| Potri.007G121500 | −0.96 | 1.45E-04 | −1.73 | 1.23E-14 |
| Potri.008G151600 | −0.65 | 2.67E-42 | −1.02 | 4.00E-108 |
| Potri.014G165100 | −1.25 | 9.25E-24 | −2.24 | 1.22E-99 |
| Potri.013G080300 | −1.17 | 0.0023 | −1.33 | 8.90E-160 |
| Potri.015G065400 | −0.87 | 1.73E-09 | −0.69 | 1.67E-05 |
| Potri.014G069100 | −1.00 | 0.001552 | −1.14 | 3.93E-04 |
| Potri.010G205800 | −0.74 | 1.01E-25 | −0.65 | 2.56E-17 |
| Potri.006G259200 | −1.34 | 0.020027 | −1.36 | 0.022805995 |
| Potri.016G062500 | −1.34 | 2.90E-15 | −1.57 | 7.95E-21 |
| Potri.010G245300 | −1.07 | 0.010266 | −1.49 | 1.98E-04 |
| Potri.018G089500 | −0.86 | 6.76E-04 | −2.61 | 3.61E-44 |
| Potri.017G097400 | −2.28 | 0.027953 | −2.72 | 0.00528936 |
| Potri.007G090600 | −0.95 | 0.001486 | −1.80 | 6.97E-12 |
| Potri.001G372100 | −1.14 | 2.90E-04 | −1.18 | 2.55E-04 |

**Table S3.** *Cont.*

| **Poplar Genes** | **Log2 (PMR-H *vs.* Female Parent)** | ***p*** | **Log2 (PMR-H *vs.* Male Parent)** | ***p*** |
| --- | --- | --- | --- | --- |
| Potri.004G172000 | −0.69 | 0.002057 | −1.33 | 7.00E-11 |
| Potri.006G144000 | −0.62 | 1.36E-27 | −0.87 | 6.62E-52 |
| Potri.019G116800 | −0.60 | 0.005668 | −0.62 | 0.007706777 |
| Potri.015G087600 | −0.62 | 6.27E-07 | −0.62 | 3.70E-06 |
| Potri.006G196400 | −1.26 | 7.70E-05 | −1.28 | 9.79E-05 |
| Potri.008G130500 | −0.63 | 3.73E-06 | −0.69 | 1.77E-06 |
| Potri.008G169800 | −0.91 | 0.006367 | −1.14 | 6.55E-04 |
| Potri.016G137900 | −0.63 | 4.77E-04 | −1.29 | 4.59E-15 |
| Potri.005G155700 | −1.06 | 0.001818 | −1.16 | 8.91E-04 |
| Potri.017G017300 | −0.97 | 0.002889 | −1.16 | 4.47E-04 |
| Potri.001G032500 | −1.17 | 1.85E-06 | −1.30 | 2.01E-07 |
| Potri.008G151100 | −1.23 | 0.003544 | −1.33 | 0.001971404 |
| Potri.016G065000 | −1.22 | 0.031194 | −1.26 | 0.030506937 |
| Potri.006G044400 | −1.02 | 0.004594 | −1.85 | 6.51E-09 |
| Potri.003G065300 | −0.65 | 1.44E-16 | −1.47 | 6.58E-100 |
| Potri.009G148000 | −2.00 | 9.53E-13 | −2.54 | 1.18E-22 |
| Potri.005G133100 | −0.80 | 2.86E-42 | −0.70 | 4.97E-28 |
| Potri.004G150300 | −0.67 | 0.011391 | −0.70 | 0.013959966 |
| Potri.008G189200 | −0.79 | 4.18E-04 | −0.84 | 3.21E-04 |
| Potri.009G094100 | −1.71 | 8.16E-04 | −2.82 | 3.84E-11 |
| Potri.016G025000 | −0.68 | 1.58E-14 | −0.62 | 1.52E-10 |
| Potri.017G080000 | −1.33 | 0.023407 | −1.51 | 0.009984335 |
| Potri.006G109100 | −1.11 | 1.25E-08 | −1.68 | 1.52E-20 |
| Potri.005G240700 | −1.31 | 1.91E-23 | −1.92 | 6.67E-57 |
| Potri.010G175200 | −1.54 | 7.82E-07 | −1.74 | 2.00E-08 |
| Potri.015G056900 | −1.24 | 3.72E-18 | −0.73 | 1.60E-05 |
| Potri.008G181900 | −0.61 | 3.43E-25 | −0.75 | 2.12E-35 |
| Potri.003G052500 | −0.70 | 9.81E-59 | −0.90 | 1.03E-94 |
| Potri.008G086500 | −1.42 | 0.001698 | −1.64 | 2.63E-04 |
| Potri.001G466000 | −0.60 | 2.44E-26 | −0.68 | 1.75E-30 |
| Potri.009G015700 | −0.90 | 1.47E-16 | −0.91 | 1.91E-15 |
| Potri.006G243600 | −1.11 | 2.19E-32 | −0.88 | 2.00E-17 |
| Potri.006G243700 | −1.14 | 5.96E-41 | −0.72 | 2.68E-13 |
| Potri.001G190700 | −1.22 | 0.02673 | −1.32 | 0.018634405 |
| Potri.001G154200 | −1.73 | 0.001652 | −2.29 | 6.75E-06 |
| Potri.016G120000 | −1.34 | 1.08E-04 | −0.90 | 0.023838344 |
| Potri.009G131800 | −1.43 | 0.01373 | −2.27 | 8.32E-06 |
| Potri.004G175800 | −0.70 | 3.14E-12 | −1.06 | 6.94E-28 |
| Potri.T135400 | −0.67 | 4.29E-04 | −1.05 | 1.23E-08 |
| Potri.004G078100 | −1.64 | 3.69E-19 | −1.68 | 2.84E-19 |
| Potri.003G202500 | −0.91 | 4.44E-09 | −1.35 | 1.06E-19 |
| Potri.T141000 | −0.98 | 2.34E-21 | −0.98 | 7.59E-20 |
| Potri.005G122600 | −1.23 | 0.021108 | −1.81 | 2.60E-04 |

**Table S3.** *Cont.*

| **Poplar Genes** | **Log2 (PMR-H *vs.* Female Parent)** | ***p*** | **Log2 (PMR-H *vs.* Male Parent)** | ***p*** |
| --- | --- | --- | --- | --- |
| Potri.006G076400 | −0.92 | 0.037582 | −0.99 | 0.029572568 |
| Potri.001G254100 | −1.03 | 8.26E-17 | −0.86 | 2.19E-10 |
| Potri.010G161400 | −0.67 | 0.001165 | −0.99 | 1.17E-06 |
| Potri.008G041000 | −1.04 | 1.36E-09 | −1.08 | 1.58E-09 |
| Potri.011G168700 | −0.80 | 6.35E-32 | −1.08 | 8.20E-58 |
| Potri.015G128400 | −1.20 | 7.41E-05 | −1.55 | 1.14E-07 |
| Potri.003G136700 | −0.74 | 0.022174 | −1.07 | 7.70E-04 |
| Potri.001G182100 | −1.35 | 4.37E-10 | −0.95 | 1.25E-04 |
| Potri.016G003400 | −1.53 | 3.26E-44 | −1.16 | 1.64E-21 |
| Potri.010G053400 | −1.30 | 6.68E-29 | −0.64 | 6.15E-06 |
| Potri.005G191400 | −0.63 | 0.004396 | −0.82 | 2.77E-04 |
| Potri.001G056700 | −0.62 | 2.08E-21 | −0.77 | 6.53E-30 |
| Potri.002G119700 | −0.97 | 0.0077 | −1.66 | 4.37E-07 |
| Potri.010G167200 | −0.73 | 1.50E-16 | −1.00 | 8.56E-30 |
| Potri.001G066400 | −0.69 | 5.00E-13 | −0.93 | 4.02E-22 |
| Potri.011G081400 | −0.79 | 1.71E-05 | −0.90 | 2.45E-06 |
| Potri.019G024600 | −1.03 | 2.80E-47 | −1.31 | 2.85E-77 |
| Potri.005G077300 | −0.79 | 1.97E-05 | −0.98 | 1.69E-07 |
| Potri.008G054000 | −2.10 | 0.00023 | −1.72 | 5.62E-84 |
| Potri.013G154700 | −1.28 | 7.22E-17 | −0.91 | 1.68E-07 |
| Potri.004G200400 | −1.15 | 0.026571 | −1.91 | 3.71E-05 |
| Potri.014G056600 | −1.57 | 1.58E-59 | −1.40 | 1.84E-42 |
| Potri.007G138100 | −1.11 | 0.009806 | −1.56 | 1.39E-04 |
| Potri.004G164700 | −1.16 | 0.001432 | −1.31 | 3.75E-04 |
| Potri.006G032300 | −0.91 | 0.01198 | −1.09 | 0.002783892 |
| Potri.010G060100 | −0.90 | 4.70E-09 | −0.88 | 6.52E-08 |
| Potri.016G087000 | −0.77 | 0.021727 | −1.19 | 2.15E-04 |
| Potri.001G087700 | −0.94 | 0.014011 | −1.52 | 1.80E-05 |
| Potri.003G169700 | −1.90 | 0.010926 | −2.68 | 5.01E-05 |
| Potri.T063100 | −1.00 | 1.01E-06 | −0.62 | 0.009730896 |
| Potri.015G146400 | −0.74 | 2.63E-06 | −1.30 | 8.73E-19 |
| Potri.005G174400 | −1.19 | 6.58E-09 | −1.29 | 6.66E-10 |
| Potri.019G094000 | −0.83 | 7.78E-08 | −1.99 | 2.32E-54 |
| Potri.010G059900 | −1.44 | 3.57E-31 | −1.20 | 4.44E-19 |
| Potri.010G206600 | −1.53 | 0.000122 | −1.49 | 2.59E-102 |
| Potri.013G061200 | −1.12 | 1.26E-08 | −1.16 | 1.09E-08 |
| Potri.010G059700 | −1.33 | 3.07E-46 | −1.63 | 8.79E-73 |
| Potri.004G211600 | −0.80 | 4.30E-14 | −0.71 | 5.27E-10 |
| Potri.008G067300 | −0.73 | 3.33E-29 | −0.92 | 2.43E-43 |
| Potri.001G221700 | −1.93 | 3.20E-26 | −1.71 | 2.39E-18 |
| Potri.010G199100 | −0.98 | 0.00779 | −1.36 | 1.17E-04 |
| Potri.006G012300 | −4.59 | 4.13E-10 | −3.43 | 1.67E-04 |
| Potri.005G239200 | −0.66 | 0.000321 | −0.76 | 2.51E-289 |

**Table S3.** *Cont.*

| **Poplar Genes** | **Log2 (PMR-H *vs.* Female Parent)** | ***p*** | **Log2 (PMR-H *vs.* Male Parent)** | ***p*** |
| --- | --- | --- | --- | --- |
| Potri.005G010300 | −0.67 | 1.30E-05 | −0.69 | 2.96E-05 |
| Potri.013G138300 | −0.92 | 0.002311 | −1.10 | 2.89E-04 |
| Potri.008G061800 | −1.21 | 7.22E-05 | −1.90 | 7.10E-12 |
| Potri.011G079500 | −0.70 | 0.000453 | −0.75 | 2.98E-228 |
| Potri.002G044300 | −0.85 | 9.82E-13 | −0.60 | 1.09E-05 |
| Potri.010G171500 | −0.65 | 4.76E-06 | −0.62 | 6.54E-05 |
| Potri.005G155300 | −1.04 | 0.005071 | −1.24 | 8.80E-04 |
| Potri.001G254700 | −1.89 | 1.01E-37 | −1.96 | 1.25E-39 |
| Potri.016G036600 | −0.60 | 0.039813 | −0.98 | 5.71E-04 |
| Potri.003G150800 | −0.94 | 0.025078 | −1.44 | 2.58E-04 |
| Potri.019G117100 | −1.52 | 2.47E-05 | −0.99 | 0.017979737 |
| Potri.017G016000 | −0.63 | 0.023298 | −1.16 | 7.48E-06 |
| Potri.018G048100 | −1.07 | 0.006864 | −0.91 | 0.035345884 |
| Potri.019G031900 | −0.89 | 7.02E-05 | −1.23 | 1.87E-08 |
| Potri.017G146600 | −1.74 | 0.000463 | −1.48 | 9.87E-111 |
| Potri.T141200 | −0.98 | 9.07E-21 | −0.99 | 1.13E-19 |
| Potri.019G033500 | −0.71 | 0.015341 | −0.78 | 0.010852261 |
| Potri.016G101700 | −1.80 | 8.45E-14 | −2.02 | 1.65E-17 |
| Potri.010G042100 | −0.82 | 9.55E-04 | −1.18 | 9.31E-07 |
| Potri.001G438600 | −0.61 | 1.03E-07 | −1.08 | 2.10E-23 |
| Potri.T100900 | −1.56 | 0.021668 | −2.31 | 1.41E-04 |
| Potri.011G160800 | −2.14 | 0.027268 | −3.09 | 2.04E-04 |
| Potri.010G060200 | −1.12 | 5.74E-49 | −1.52 | 1.47E-97 |
| Potri.014G056500 | −2.71 | 7.29E-09 | −1.71 | 0.002909881 |
| Potri.005G081400 | −1.66 | 2.24E-04 | −1.27 | 0.011859434 |
| Potri.005G132300 | −0.86 | 8.03E-32 | −0.80 | 2.20E-24 |
| Potri.003G170000 | −3.03 | 1.99E-11 | −1.99 | 3.37E-04 |
| Potri.009G129900 | −0.94 | 1.72E-06 | −1.71 | 2.05E-22 |
| Potri.019G081200 | −1.76 | 8.25E-97 | −1.36 | 1.32E-47 |
| Potri.007G103800 | −0.61 | 1.58E-04 | −1.18 | 5.24E-15 |
| Potri.010G059800 | −1.24 | 4.84E-09 | −1.84 | 5.66E-21 |
| Potri.003G170200 | −2.41 | 1.95E-05 | −3.05 | 2.47E-09 |
| Potri.009G128500 | −0.71 | 1.24E-05 | −0.78 | 4.64E-06 |
| Potri.017G081300 | −0.84 | 5.55E-06 | −1.02 | 6.19E-08 |
| Potri.011G112400 | −2.16 | 0.012922 | −1.91 | 0.040204578 |
| Potri.008G100500 | −0.74 | 0.003512 | −1.07 | 1.42E-05 |
| Potri.015G112300 | −0.83 | 0.007902 | −1.15 | 1.83E-04 |
| Potri.018G022400 | −0.91 | 2.29E-07 | −1.47 | 4.76E-19 |
| Potri.014G111400 | −0.89 | 0.004374 | −0.96 | 0.003238019 |
| Potri.006G033500 | −1.03 | 7.63E-04 | −0.98 | 0.002531604 |
| Potri.014G170400 | −0.87 | 0.016323 | −0.97 | 0.009785303 |
| Potri.017G041700 | −2.92 | 2.06E-05 | −3.30 | 3.97E-07 |
| Potri.001G191400 | −0.62 | 2.62E-06 | −0.94 | 6.48E-13 |

**Table S3.** *Cont.*

| **Poplar Genes** | **Log2 (PMR-H *vs.* Female Parent)** | ***p*** | **Log2 (PMR-H *vs.* Male Parent)** | ***p*** |
| --- | --- | --- | --- | --- |
| Potri.013G112300 | −0.67 | 0.021661 | −0.84 | 0.004409647 |
| Potri.005G120500 | −0.84 | 1.42E-04 | −0.91 | 7.88E-05 |
| Potri.016G065300 | −0.71 | 2.14E-05 | −1.06 | 1.16E-10 |
| Potri.014G096200 | −1.06 | 0.010633 | −1.27 | 0.002325431 |
| Potri.014G138900 | −0.92 | 0.049649 | −1.75 | 2.26E-05 |
| Potri.002G252300 | −2.83 | 0.005044 | −3.76 | 1.51E-05 |
| Potri.001G248100 | −1.05 | 4.52E-09 | −1.03 | 4.62E-08 |
| Potri.016G029600 | −0.82 | 0.001473 | −0.80 | 0.003340312 |
| Potri.019G024800 | −0.61 | 0.044188 | −0.68 | 0.034327423 |
| Potri.006G197000 | −1.21 | 1.18E-06 | −1.20 | 3.29E-06 |
| Potri.009G047700 | −0.61 | 1.44E-07 | −0.89 | 1.00E-14 |
| Potri.017G095500 | −1.97 | 0.024165 | −3.01 | 4.66E-05 |
| Potri.002G020800 | −1.77 | 1.53E-13 | −1.12 | 7.14E-05 |
| Potri.005G190800 | −1.35 | 0.013216 | −1.27 | 0.02694349 |
| Potri.004G199400 | −0.75 | 6.02E-42 | −0.83 | 5.67E-47 |
| Potri.011G070800 | −2.56 | 0.002231 | −2.91 | 2.76E-04 |
| Potri.010G078800 | −0.74 | 0.003463 | −0.79 | 0.002926247 |
| Potri.018G089100 | −1.05 | 3.30E-05 | −1.35 | 4.66E-08 |
| Potri.001G221800 | −0.59 | 0.002198 | −1.63 | 6.41E-24 |
| Potri.016G115200 | −0.81 | 7.14E-48 | −0.62 | 1.24E-22 |
| Potri.001G221900 | −1.51 | 0.000653 | −1.51 | 6.00E-97 |
| Potri.002G094200 | −0.73 | 5.46E-04 | −1.15 | 1.70E-08 |
| Potri.017G000700 | −0.83 | 0.016004 | −0.91 | 0.010343175 |
| Potri.001G221500 | −1.46 | 2.06E-11 | −1.57 | 1.03E-12 |
| Potri.003G169800 | −1.82 | 0.046883 | −2.47 | 0.003040936 |
| Potri.017G130700 | −1.80 | 1.80E-47 | −1.28 | 2.81E-19 |
| Potri.008G054600 | −0.94 | 1.22E-38 | −0.74 | 5.29E-20 |
| Potri.008G113400 | −1.09 | 0.003526 | −0.98 | 0.013510961 |
| Potri.011G057600 | −1.01 | 8.08E-12 | −1.06 | 4.89E-12 |
| Potri.001G059500 | −1.60 | 0.010345 | −2.14 | 2.33E-04 |
| Potri.019G073700 | −1.00 | 0.001186 | −0.84 | 0.012938625 |
| Potri.008G102600 | −1.26 | 1.09E-08 | −1.65 | 6.30E-15 |
| Potri.001G404600 | −0.62 | 0.024363 | −1.29 | 2.15E-07 |
| Potri.013G143200 | −0.95 | 0.001251 | −1.16 | 7.31E-05 |
| Potri.002G009800 | −0.60 | 1.77E-16 | −0.76 | 1.95E-24 |
| Potri.001G468100 | −0.88 | 0.003314 | −1.46 | 1.62E-07 |
| Potri.010G062900 | −1.03 | 3.09E-11 | −1.37 | 8.95E-20 |
| Potri.001G108100 | −0.79 | 0.002175 | −0.84 | 0.00194986 |
| Potri.007G099400 | −1.32 | 0.031335 | −2.22 | 3.35E-05 |
| Potri.002G252200 | −1.38 | 1.86E-44 | −2.36 | 2.98E-174 |
| Potri.004G142900 | −0.79 | 1.08E-08 | −0.93 | 5.05E-11 |
| Potri.001G286700 | −1.43 | 0.000543 | −1.04 | 1.22E-43 |

**Table S3.** *Cont.*

| **Poplar Genes** | **Log2 (PMR-H *vs.* Female Parent)** | ***p*** | **Log2 (PMR-H *vs.* Male Parent)** | ***p*** |
| --- | --- | --- | --- | --- |
| Potri.016G124900 | −1.58 | 3.43E-07 | −2.64 | 4.51E-24 |
| Potri.013G140100 | −1.04 | 0.000765 | −1.00 | 1.53E-206 |
| Potri.001G221100 | −1.79 | 1.98E-18 | −1.40 | 5.88E-10 |
| Potri.T160400 | −1.37 | 5.43E-16 | −1.05 | 2.45E-08 |
| Potri.013G082700 | −1.61 | 7.17E-56 | −0.86 | 3.59E-12 |
| Potri.001G393800 | −2.54 | 2.01E-06 | −1.53 | 0.020583023 |
| Potri.010G059600 | −1.04 | 1.83E-09 | −1.69 | 8.86E-27 |
| Potri.013G082600 | −1.69 | 1.58E-23 | −2.22 | 2.88E-45 |
| Potri.011G074900 | −1.76 | 1.42E-15 | −1.70 | 9.68E-14 |
| Potri.004G172300 | −2.03 | 7.29E-26 | −1.84 | 2.67E-19 |
| Potri.013G082800 | −1.36 | 2.71E-83 | −1.16 | 4.33E-52 |
| Potri.013G029600 | −2.56 | 0.008698 | −3.31 | 1.35E-04 |
| Potri.004G168600 | −0.83 | 2.00E-15 | −0.92 | 2.22E-17 |
| Potri.009G156900 | −0.64 | 4.17E-04 | −0.65 | 9.23E-04 |
| Potri.007G033700 | −0.60 | 5.86E-40 | −0.67 | 1.89E-45 |
| Potri.010G004000 | −0.84 | 3.05E-04 | −1.05 | 7.49E-06 |
| Potri.004G054600 | −1.90 | 1.71E-05 | −2.49 | 8.42E-10 |
| Potri.019G099400 | −1.66 | 0.035651 | −1.99 | 0.00918232 |
| Potri.007G089000 | −0.80 | 1.33E-20 | −0.69 | 3.16E-13 |
| Potri.001G143900 | −0.89 | 0.019529 | −1.08 | 0.004971638 |

**Table S4.** 49 genes were up-regulated in the high-growth allotriploid progeny (PMR-H) compared to the male parent and down-regulated in the PMR-H compared to the female parent.

| **Poplar Genes** | **Log2 (PMR-H *vs.* Female Parent)** | ***p*** | **Log2 (PMR-H *vs.*  Male Parent)** | ***p*** |
| --- | --- | --- | --- | --- |
| Potri.005G098700 | −1.08 | 0.018728 | 1.87 | 0.01037933 |
| Potri.017G034500 | −1.16 | 0.005107 | 2.55 | 7.61E-04 |
| Potri.004G143100 | −0.63 | 0.003415 | 3.83 | 3.96E-18 |
| Potri.013G136600 | −0.89 | 0.002088 | 0.94 | 0.009656594 |
| Potri.014G055100 | −1.20 | 6.73E-04 | 1.12 | 0.022623504 |
| Potri.016G132100 | −0.71 | 0.003654 | 0.95 | 0.001244405 |
| Potri.T052200 | −1.04 | 0.003253 | 1.21 | 0.012491008 |
| Potri.T051200 | −1.08 | 2.52E-06 | 1.33 | 4.60E-05 |
| Potri.009G075400 | −0.72 | 0.01599 | 0.76 | 0.028745574 |
| Potri.013G137000 | −1.08 | 0.020818 | 1.78 | 0.014311468 |
| Potri.013G136700 | −0.92 | 0.021044 | 1.75 | 0.003621714 |
| Potri.013G141800 | −1.43 | 2.74E-08 | 1.18 | 0.001819242 |
| Potri.016G061500 | −0.88 | 0.004965 | 1.88 | 8.18E-05 |
| Potri.001G466500 | −0.61 | 0.022476 | 1.12 | 7.22E-04 |
| Potri.011G108900 | −0.64 | 0.01524 | 0.62 | 0.030636623 |
| Potri.011G113700 | −1.24 | 0.001067 | 1.42 | 0.012235683 |
| Potri.013G134300 | −0.70 | 0.006225 | 1.19 | 3.20E-04 |

**Table S4.** *Cont.*

| **Poplar Genes** | **Log2 (PMR-H *vs.* Female Parent)** | ***p*** | **Log2 (PMR-H *vs.*  Male Parent)** | ***p*** |
| --- | --- | --- | --- | --- |
| Potri.017G108500 | −1.36 | 0.001067 | 0.69 | 3.38E-34 |
| Potri.T094200 | −0.59 | 5.87E-18 | 0.61 | 6.98E-17 |
| Potri.T094100 | −0.86 | 5.10E-26 | 1.02 | 2.04E-22 |
| Potri.019G028100 | −1.49 | 1.10E-09 | 0.97 | 0.005324308 |
| Potri.015G024000 | −0.85 | 5.40E-04 | 0.66 | 0.019553518 |
| Potri.011G074600 | −1.22 | 0.003517 | 1.70 | 0.009461853 |
| Potri.019G028300 | −1.28 | 3.48E-07 | 1.03 | 0.00301508 |
| Potri.019G028600 | −0.84 | 0.004987 | 1.46 | 5.05E-04 |
| Potri.008G223500 | −1.04 | 1.09E-06 | 0.95 | 6.29E-04 |
| Potri.006G047500 | −0.68 | 0.001314 | 5.21 | 1.83E-20 |
| Potri.013G125000 | −0.96 | 0.00575 | 2.13 | 1.46E-04 |
| Potri.013G142500 | −1.28 | 2.62E-05 | 1.49 | 0.001261256 |
| Potri.019G014800 | −1.03 | 0.004919 | 1.23 | 0.014723028 |
| Potri.011G021200 | −1.04 | 3.02E-05 | 4.55 | 6.41E-13 |
| Potri.017G035400 | −1.13 | 0.002747 | 3.84 | 9.28E-06 |
| Potri.T158800 | −0.84 | 1.46E-11 | 5.49 | 3.73E-53 |
| Potri.015G122000 | −1.27 | 2.21E-04 | 1.17 | 0.017520416 |
| Potri.017G052000 | −0.67 | 0.00967 | 1.68 | 4.73E-06 |
| Potri.T162600 | −1.24 | 0.022721 | 1.81 | 0.038936183 |
| Potri.013G142400 | −1.06 | 0.018762 | 1.48 | 0.025143244 |
| Potri.013G142600 | −0.78 | 0.027469 | 1.44 | 0.003001649 |
| Potri.001G451800 | −0.59 | 0.049361 | 1.82 | 2.23E-05 |
| Potri.009G160800 | −1.00 | 1.44E-10 | 1.79 | 6.71E-14 |
| Potri.017G035500 | −1.01 | 2.47E-04 | 1.99 | 6.61E-06 |
| Potri.004G156600 | −1.10 | 1.04E-07 | 2.15 | 5.96E-10 |
| Potri.001G287400 | −0.95 | 0.00391 | 2.61 | 8.39E-06 |
| Potri.013G137300 | −0.95 | 0.005342 | 1.71 | 7.77E-04 |
| Potri.017G132500 | −0.99 | 0.007999 | 1.81 | 0.001615548 |
| Potri.013G142300 | −1.11 | 0.003937 | 1.18 | 0.027750173 |
| Potri.019G124600 | −0.87 | 5.77E-06 | 0.66 | 0.003265092 |
| Potri.004G156700 | −1.17 | 1.30E-07 | 1.70 | 8.52E-07 |
| Potri.008G175000 | −1.42 | 0.004519 | 2.40 | 0.00959689 |

**Table S5.** 89 genes were up-regulated in the high-growth allotriploid progeny (PMR-H) compared to the female parent and down-regulated in the PMR-H compared to the
male parent.

| **Poplar Genes** | **Log2 (PMR-H *vs.*  Female Parent)** | ***p*** | **Log2 (PMR-H *vs.*  Male Parent)** | ***p*** |
| --- | --- | --- | --- | --- |
| Potri.010G195700 | 0.60 | 4.33E-09 | −0.64 | 1.25E-11 |
| Potri.T012700 | 0.85 | 3.82E-06 | −0.78 | 4.53E-07 |
| Potri.015G027700 | 3.22 | 1.29E-06 | −0.97 | 0.005398987 |
| Potri.001G065500 | 2.21 | 0.02279 | −1.29 | 0.021642455 |
| Potri.005G129700 | 1.73 | 8.91E-04 | −0.75 | 0.044388459 |
| Potri.017G038000 | 1.11 | 0.047554 | −0.92 | 0.033160751 |
| Potri.012G137600 | 5.90 | 1.03E-23 | −1.31 | 1.48E-13 |
| Potri.T131500 | 2.39 | 3.66E-11 | −1.42 | 7.25E-13 |
| Potri.014G106600 | 1.96 | 2.25E-06 | −0.98 | 2.91E-04 |
| Potri.T020000 | 1.31 | 0.010666 | −0.70 | 4.93E-48 |
| Potri.009G095400 | 1.08 | 3.57E-16 | −0.61 | 5.43E-08 |
| Potri.009G142300 | 1.98 | 3.90E-06 | −1.74 | 1.81E-13 |
| Potri.010G062600 | 0.74 | 0.02303 | −0.85 | 0.001845743 |
| Potri.T091800 | 2.23 | 0.003197 | −1.20 | 0.00730351 |
| Potri.019G080600 | 0.87 | 0.007019 | −1.09 | 1.14E-05 |
| Potri.006G112500 | 0.82 | 0.038526 | −1.44 | 5.16E-07 |
| Potri.001G405700 | 3.02 | 0.010001 | −1.41 | 0.014345549 |
| Potri.001G169000 | 2.47 | 2.07E-21 | −1.71 | 4.09E-38 |
| Potri.017G037900 | 1.25 | 0.006367 | −0.85 | 0.015340072 |
| Potri.015G025700 | 1.15 | 0.010666 | −0.94 | 0.005782087 |
| Potri.008G133600 | 0.99 | 9.94E-07 | −0.88 | 3.61E-08 |
| Potri.011G158500 | 1.25 | 0.00209 | −1.61 | 7.76E-10 |
| Potri.006G087200 | 2.96 | 6.36E-04 | −2.93 | 7.62E-20 |
| Potri.005G087900 | 3.48 | 1.52E-08 | −1.56 | 7.89E-09 |
| Potri.016G083500 | 1.40 | 4.31E-07 | −0.65 | 0.003194448 |
| Potri.015G071500 | 1.41 | 8.07E-16 | −0.94 | 9.34E-14 |
| Potri.001G459300 | 2.40 | 0.005112 | −1.07 | 0.034896892 |
| Potri.006G172300 | 1.49 | 0.046082 | −2.41 | 1.16E-09 |
| Potri.014G005200 | 0.80 | 1.20E-05 | −0.60 | 2.83E-04 |
| Potri.007G000800 | 1.18 | 7.17E-04 | −0.99 | 1.45E-04 |
| Potri.012G086200 | 0.63 | 0.038134 | −1.72 | 1.19E-15 |
| Potri.011G087600 | 2.39 | 0.001906 | −2.94 | 1.28E-20 |
| Potri.013G105700 | 0.91 | 0.006607 | −1.26 | 3.82E-07 |
| Potri.017G044500 | 2.49 | 8.33E-10 | −0.87 | 4.45E-04 |
| Potri.005G002800 | 0.69 | 0.019735 | −1.01 | 2.96E-05 |
| Potri.009G142000 | 2.11 | 0.004281 | −1.95 | 3.36E-07 |
| Potri.016G130500 | 0.84 | 5.13E-06 | −0.86 | 1.79E-08 |
| Potri.007G112700 | 2.44 | 0.004615 | −1.36 | 0.003824503 |
| Potri.T019900 | 0.87 | 0.001029 | −0.83 | 1.48E-04 |
| Potri.T149500 | 1.49 | 8.85E-05 | −0.60 | 0.04466967 |

**Table S5.** *Cont.*

| **Poplar Genes** | **Log2 (PMR-H *vs.*  Female Parent)** | ***p*** | **Log2 (PMR-H *vs.*  Male Parent)** | ***p*** |
| --- | --- | --- | --- | --- |
| Potri.008G004700 | 0.59 | 7.65E-04 | −1.57 | 3.46E-34 |
| Potri.006G045900 | 1.05 | 0.013266 | −0.75 | 0.031309861 |
| Potri.006G034100 | 2.33 | 1.77E-21 | −1.17 | 2.38E-16 |
| Potri.003G188800 | 0.91 | 0.002542 | −0.73 | 0.003783395 |
| Potri.015G027800 | 4.19 | 1.87E-11 | −1.13 | 2.09E-05 |
| Potri.T029200 | 2.24 | 3.02E-07 | −2.15 | 4.55E-24 |
| Potri.003G189000 | 3.05 | 9.97E-04 | −1.57 | 3.25E-04 |
| Potri.016G109000 | 0.99 | 0.015189 | −0.70 | 0.039591023 |
| Potri.004G164400 | 1.19 | 8.02E-04 | −1.25 | 4.72E-07 |
| Potri.016G057400 | 0.81 | 5.89E-05 | −1.62 | 1.57E-30 |
| Potri.007G030500 | 1.20 | 0.046225 | −1.25 | 0.003174058 |
| Potri.007G133500 | 1.31 | 1.31E-09 | −0.61 | 4.97E-04 |
| Potri.013G039900 | 2.59 | 1.29E-04 | −1.05 | 0.00629576 |
| Potri.011G135000 | 2.31 | 7.76E-05 | −1.71 | 1.95E-08 |
| Potri.004G027200 | 1.21 | 0.009702 | −1.23 | 2.01E-04 |
| Potri.016G126800 | 2.09 | 0.01222 | −1.25 | 0.012027384 |
| Potri.014G106500 | 1.48 | 0.016003 | −1.06 | 0.01250939 |
| Potri.007G021300 | 0.93 | 1.90E-09 | −1.14 | 2.88E-22 |
| Potri.015G000500 | 1.10 | 8.39E-10 | −2.53 | 2.19E-143 |
| Potri.T091700 | 1.04 | 3.77E-06 | −0.96 | 4.27E-08 |
| Potri.014G148200 | 0.82 | 8.83E-04 | −0.63 | 0.003854788 |
| Potri.012G089900 | 2.36 | 4.54E-05 | −1.64 | 6.21E-08 |
| Potri.009G141800 | 7.02 | 1.84E-33 | −1.29 | 7.23E-19 |
| Potri.002G073800 | 1.46 | 0.035625 | −1.11 | 0.02032856 |
| Potri.012G028100 | 3.54 | 5.08E-07 | −1.72 | 6.56E-09 |
| Potri.T024800 | 1.95 | 0.020116 | −1.32 | 0.009251679 |
| Potri.001G032400 | 3.38 | 4.34E-06 | −1.55 | 2.57E-06 |
| Potri.017G097700 | 2.39 | 1.54E-04 | −2.20 | 1.05E-13 |
| Potri.004G123500 | 2.75 | 0.002063 | −1.71 | 7.29E-05 |
| Potri.002G074000 | 0.90 | 0.020026 | −0.97 | 0.001635831 |
| Potri.017G089000 | 2.07 | 0.001166 | −1.16 | 0.002979965 |
| Potri.014G006900 | 0.84 | 0.006092 | −0.69 | 0.010140039 |
| Potri.013G002200 | 1.00 | 0.002074 | −1.02 | 4.20E-05 |
| Potri.008G131300 | 1.07 | 1.21E-21 | −0.78 | 7.48E-18 |
| Potri.009G104300 | 2.23 | 9.21E-06 | −0.79 | 0.015514331 |
| Potri.007G118600 | 1.96 | 0.014851 | −1.48 | 0.001520052 |
| Potri.014G101700 | 0.69 | 0.026822 | −0.62 | 0.030048569 |
| Potri.016G076200 | 2.35 | 1.02E-13 | −0.60 | 0.005184265 |
| Potri.T120900 | 1.30 | 2.10E-04 | −1.03 | 4.75E-05 |
| Potri.T121300 | 0.81 | 0.012655 | −0.59 | 0.04477425 |
| Potri.015G128300 | 1.11 | 0.001062 | −0.80 | 0.002906852 |
| Potri.006G187500 | 2.67 | 0.009647 | −2.39 | 6.96E-08 |
| Potri.007G026800 | 0.81 | 0.002035 | −1.02 | 1.18E-06 |

**Table S5.** *Cont.*

| **Poplar Genes** | **Log2 (PMR-H *vs.*  Female Parent)** | ***p*** | **Log2 (PMR-H *vs.*  Male Parent)** | ***p*** |
| --- | --- | --- | --- | --- |
| Potri.004G149800 | 0.90 | 0.020533 | −1.11 | 2.07E-04 |
| Potri.013G039700 | 2.65 | 1.86E-05 | −0.92 | 0.011089187 |
| Potri.003G082100 | 1.13 | 0.001403 | −1.29 | 2.28E-07 |
| Potri.001G158600 | 1.94 | 0.039425 | −1.31 | 0.021384596 |
| Potri.003G188900 | 1.35 | 1.78E-04 | −1.24 | 4.57E-07 |
| Potri.001G293400 | 2.42 | 5.06E-17 | −1.81 | 8.89E-36 |

**Table S6.** Non-additive transcription factor (TF) gene expression in the high-growth allotriploid progeny (PMR-H).

| **TF-Family** | **Poplar Gene_ID** | **Poplar Gene Model** | **GO Annotation** |
| --- | --- | --- | --- |
| MYB | Potri.004G126700 | POPTR_0004s12530 | - GO:0009733 response to auxin - GO:0009739 response to gibberellin - GO:0009751 response to salicylic acid - GO:0006355 regulation of transcription |
| Potri.019G045900 | POPTR_0019s06290 | - GO:0010118 stomatal movement - GO:0009414 response to water deprivation - GO:0009737 response to abscisic acid - GO:0010118 stomatal movement |
| Potri.012G084100 | POPTR_0012s08600 | GO:0006355 regulation of transcription |
| Potri.008G128500 | POPTR_0008s12750 | GO:0009751 response to salicylic acid |
| Potri.013G056500 | POPTR_0013s05310 | GO:0010468 regulation of gene expression |
| Potri.010G149900 | POPTR_0010s15970 | GO:0007165 signal transduction |
| Potri.009G134000 | POPTR_0009s13640 | - GO:0009751 response to salicylic acid - GO:0006355 regulation of transcription |
| Potri.009G096000 | POPTR_0009s09890 | - GO:0009751 response to salicylic acid - GO:0009723 response to ethylene - GO:0009737 response to abscisic acid |
| HD-ZIP | Potri.012G070900 | POPTR_0012s07270 | - GO:0009965 leaf morphogenesis - GO:0015996 chlorophyll catabolic process - GO:0045893 positive regulation  of transcription |
| Potri.018G133100 | POPTR_0018s13300 | GO:0006355 regulation of transcription |
| Potri.011G025000 | POPTR_0011s00520 | GO:0009913 epidermal cell differentiation |
| bZIP | Potri.008G113400 | POPTR_0008s11260 | GO:0006355 regulation of transcription |
| Potri.010G135200 | POPTR_0010s14530 | GO:0006355 regulation of transcription |
| Potri.007G019900 | POPTR_0007s13380 | GO:0006355 regulation of transcription |
| GRF | Potri.003G065000 | POPTR_0003s06360 | - GO:0009737 response to abscisic acid - GO:0006355 regulation of transcription - GO:0009965 leaf morphogenesis |
| M-type | Potri.003G169800 | POPTR_0003s06360 | GO:0030154 cell differentiation  GO:0042752 regulation of circadian rhythm |

**Table S6.** *Cont.*

| **TF-Family** | **Poplar Gene_ID** | **Poplar Gene Model** | **GO Annotation** |
| --- | --- | --- | --- |
| C2H2 | Potri.001G047500 | POPTR_0001s14780 | GO:0006355 regulation of transcription |
| Potri.001G235800 | POPTR_0001s24250 | GO:0009693 ethylene biosynthetic process |
| Potri.018G094300 | POPTR_0018s10230 | GO:0006355 regulation of transcription |
| NAC | Potri.002G182300 | POPTR_0002s18310 | GO:0008284 positive regulation of cell proliferation |
| Potri.014G076100 | POPTR_0014s07220 | GO:0010050 vegetative phase change |
| Potri.015G102100 | POPTR_0015s11420 | - GO:0010089 xylem development - GO:0010150 leaf senescence |
| Potri.003G089800 | POPTR_0003s08830 | GO:0006355 regulation of transcription |
| Potri.002G182000 | POPTR_0002s18290 | GO:0008284 positive regulation of  cell proliferation |
| Potri.011G123300 | POPTR_0011s12400 | - GO:0009414 response to water deprivation - GO:0009738 abscisic acid-activated signaling pathway - GO:0009733 response to auxin - GO:0009737 response to abscisic acid |
| Potri.004G181900 | POPTR_0004s18860 | GO:0009965 leaf morphogenesis |
| Potri.014G108100 | POPTR_0014s10370 | GO:0009737 response to abscisic acid |
| Potri.008G089000 | POPTR_0008s08850 | GO:0009825 multidimensional cell growth |
| Potri.014G075900 | POPTR_0014s07200 | GO:0010050 vegetative phase change |
| GRAS | Potri.012G093900 | POPTR_0012s09550 | GO:0006355 regulation of transcription |
| Potri.006G016200 | POPTR_0006s01720 | - GO:0009863 salicylic acid mediated signaling pathway - GO:0009873 ethylene-activated  signaling pathway |
| MYB_related | Potri.011G026300 | POPTR_0011s00390 | GO:0009913 epidermal cell differentiation |
| Potri.004G021300 | POPTR_0004s02060 | - GO:0080147 root hair cell development - GO:0009913 epidermal cell differentiation |
| bHLH | Potri.014G111400 | POPTR_0014s10700 | GO:0006355 regulation of transcription |
| Potri.019G099400 | POPTR_0019s13080 | GO:0006355 regulation of transcription |
| Potri.007G023600 | POPTR_0007s13020 | - GO:0009735 response to cytokinin - GO:0009725 response to hormone - GO:0009826 unidimensional cell growth |
| Potri.019G099300 | POPTR_0019s13070 | GO:0006355 regulation of transcription |
| Potri.019G099500 | POPTR_0019s13090 | GO:0006355 regulation of transcription |
| Potri.018G141700 | POPTR_0018s13850 | GO:0009753 response to jasmonic acid |
| Potri.004G031800 | POPTR_0004s03190 | GO:0006355 regulation of transcription |

**Table S6.** *Cont.*

| **TF-Family** | **Poplar Gene_ID** | **Poplar Gene Model** | **GO Annotation** |
| --- | --- | --- | --- |
| WRKY | Potri.016G099900 | POPTR_0016s10610 | GO:0006355 regulation of transcription |
| Potri.016G137900 | POPTR_0016s14490 | GO:0009697 salicylic acid biosynthetic process |
| Potri.006G263600 | POPTR_0006s27950 | GO:0009751 response to salicylic acid |
| Potri.001G208600 | POPTR_0001s21580 | GO:0006355 regulation of transcription |
| Potri.003G182200 | POPTR_0003s18060 | - GO:0009697 salicylic acid  biosynthetic process - GO:0009873 ethylene-activated  signaling pathway |
| Potri.003G138600 | POPTR_0003s13840 | GO:0006355 regulation of transcription |
| Potri.006G109100 | POPTR_0006s10950 | GO:0009697 salicylic acid biosynthetic process |
| Potri.014G096200 | POPTR_0014s09190 | - GO:0009751 response to salicylic acid - GO:0009867 jasmonic acid mediated signaling pathway |
| TALE | Potri.006G230700 | POPTR_0006s24680 | - GO:0009965 leaf morphogenesis - GO:0015994 chlorophyll metabolic process - GO:0006766 vitamin metabolic process - GO:0010103 stomatal  complex morphogenesis - GO:0010371 regulation of  gibberellin biosynthetic |
| M-type | Potri.006G258500 | POPTR_0006s27470 | GO:0006355 regulation of transcription |
| MIKC | Potri.003G170000 | – | GO:0006355 regulation of transcription |
|  | Potri.005G155300 | – | - GO:0010076 maintenance of floral meristem identity - GO:0009965 leaf morphogenesis - GO:0030154 cell differentiation |
| Potri.015G098400 | POPTR_0015s11030 | GO:0006355 regulation of transcription |
| Potri.017G044200 | – | - GO:0010076 maintenance of floral meristem identity - GO:0009965 leaf morphogenesis - GO:0052543 callose deposition in cell wall - GO:0030154 cell differentiation |
| Potri.005G155700 | POPTR_0005s17950 | - GO:0009867 jasmonic acid mediated signaling pathway - GO:0010582 floral meristem determinacy - GO:0009965 leaf morphogenesis - GO:0030154 cell differentiation |
| Potri.007G115200 | POPTR_0007s03270 | GO:0030154 cell differentiation |
| Potri.003G169700 | – | GO:0006355 regulation of transcription |

**Table S6.** *Cont.*

| **TF-Family** | **Poplar Gene_ID** | **Poplar Gene Model** | **GO Annotation** |
| --- | --- | --- | --- |
| GATA | Potri.006G229200 | POPTR_0006s24560 | - GO:0009740 gibberellic acid mediated signaling pathway - GO:0007623 circadian rhythm - GO:0010380 regulation of chlorophyll biosynthetic process - GO:0009735 response to cytokinin - GO:0009416 response to light stimulus |
| AP2 | Potri.010G092800 | POPTR_0010s10290 | - GO:0009744 response to sucrose - GO:0006109 regulation of  carbohydrate metabolic - GO:0009873 ethylene-activated  signaling pathway |
| HSF | Potri.005G214800 | POPTR_0005s23640 | GO:0006355 regulation of transcription |
| Potri.006G226800 | POPTR_0006s24330 | GO:0009644 response to high light intensity |
| G2-like | Potri.019G032700 | POPTR_0019s04820 | GO:0006355 regulation of transcription |
| NF-YA | Potri.001G372100 | Potri.001G372100 | GO:0006355 regulation of transcription |
| ERF | Potri.010G006800 | POPTR_0010s00900 | - GO:0009735 response to cytokinin - GO:0009723 response to ethylene - GO:0045893 positive regulation  of transcription |
| Potri.008G215600 | POPTR_0008s22750 | - GO:0010582 floral meristem determinacy - GO:0010451 floral meristem growth - GO:0009873 ethylene-activated  signaling pathway |
| Potri.014G025200 | POPTR_0001s40770 | GO:0009873 ethylene-activated  signaling pathway |
| Potri.001G397200 | POPTR_0001s40770 | GO:0010105 negative regulation of  ethylene-activated signaling pathway |
| Potri.001G079800 | POPTR_0001s11780 | GO:0009873 ethylene-activated  signaling pathway |
| Potri.002G065600 | POPTR_0002s06620 | GO:0009873 ethylene-activated  signaling pathway |
| Potri.009G147700 | POPTR_0009s14990 | GO:0045893 positive regulation  of transcription |
| Potri.006G138800 | Potri.006G138800 | GO:0009873 ethylene-activated  signaling pathway |
| Potri.001G092400 | POPTR_0001s10540 | GO:0009873 ethylene-activated  signaling pathway |
| Potri.001G154200 | POPTR_0001s15400 | GO:0009873 ethylene-activated  signaling pathway |

**Table S6.** *Cont.*

| **TF-Family** | **Poplar Gene_ID** | **Poplar Gene Model** | **GO Annotation** |
| --- | --- | --- | --- |
|  | Potri.003G162500 | POPTR_0007s05690 | - GO:0009751 response to salicylic acid - GO:0009753 response to jasmonic acid - GO:0009723 response to ethylene - GO:0009737 response to abscisic acid |
| Potri.007G090600 | POPTR_0007s05690 | - GO:0009736 cytokinin-activated  signaling pathway - GO:0045595 regulation of  cell differentiation - GO:0009873 ethylene-activated  signaling pathway |
| Potri.011G115600 | POPTR_0011s11620 | - GO:0009723 response to ethylene - GO:0009737 response to abscisic acid - GO:0009873 ethylene-activated  signaling pathway |
| Potri.006G138700 | POPTR_0006s14090 | GO:0009873 ethylene-activated  signaling pathway |
| Potri.005G077300 | POPTR_0005s07900 | - GO:0009736 cytokinin-activated  signaling pathway - GO:0045595 regulation of  cell differentiation - GO:0009873 ethylene-activated  signaling pathway |
| Potri.010G046600 | POPTR_0010s05670 | - GO:0009733 response to auxin - GO:0009740 gibberellic acid mediated signaling pathway - GO:0009736 cytokinin-activated  signaling pathway - GO:0051726 regulation of cell cycle - GO:0009873 ethylene-activated  signaling pathway |
| Potri.007G138100 | – | GO:0009873 ethylene-activated  signaling pathway |
| Potri.006G069400 | POPTR_0006s06870 | GO:0009873 ethylene-activated  signaling pathway |
| Potri.006G218200 | POPTR_0006s23480 | GO:0009873 ethylene-activated  signaling pathway |
| Potri.003G150800 | POPTR_0003s15040 | GO:0009873 ethylene-activated  signaling pathway |
|  | Potri.002G141200 | POPTR_0002s14210 | GO:0009873 ethylene-activated  signaling pathway |

**Table S6.** *Cont.*

| **TF-Family** | **Poplar Gene_ID** | **Poplar Gene Model** | **GO Annotation** |
| --- | --- | --- | --- |
|  | Potri.002G094200 | POPTR_0002s09480 | - GO:0009736 cytokinin-activated  signaling pathway - GO:0045595 regulation of  cell differentiation - GO:0009873 ethylene-activated  signaling pathway |
|  | Potri.018G047300 | POPTR_0018s08320 | GO:0009873 ethylene-activated  signaling pathway |
|  | Potri.016G053200 | POPTR_0016s05360 | GO:0048507 meristem development |
|  | Potri.012G134100 | POPTR_0012s13870 | GO:0009738 abscisic acid-activated  signaling pathway |
| Trihelix | Potri.016G096300 | POPTR_0001s24250 | - GO:0010075 regulation of meristem growth - GO:0010014 meristem initiation |
